# Supplementary material for: Effects of weather extremes on fecal contamination along pathogen transmission pathways in rural Bangladeshi households
Source: bioRxiv or medRxiv preprint supplement (doi:10.1101/2023.12.27.23300582), 2023-12-29
Supplement: Supplementary file [file media-1.pdf]

## Supplementary Material

### Effects of weather extremes on fecal contamination along pathogen transmission pathways in rural Bangladeshi households

Caitlin Niven<sup>1\*</sup>, Mahfuza Islam<sup>2</sup>, Anna Nguyen<sup>3</sup>, Andrew Mertens<sup>4</sup>, Amy J. Pickering<sup>5</sup>, Laura H. Kwong<sup>2</sup>, Mahfuja Alam<sup>6</sup>, Debashis Sen<sup>6</sup>, Sharmin Islam<sup>6</sup>, Mahbubur Rahman<sup>6</sup>, Leanne Unicomb<sup>6</sup>, Alan E. Hubbard<sup>4</sup>, Stephen P. Luby<sup>7</sup>, John M. Colford Jr.<sup>2</sup>, Benjamin F. Arnold<sup>8</sup>, Jade Benjamin-Chung<sup>3</sup>, Ayse Ercumen<sup>1</sup>

1. Department of Forestry and Environmental Resources, North Carolina State University, Raleigh, NC 27695
2. Division of Environmental Health Sciences, School of Public Health, University of California, Berkeley, CA 94720
3. Department of Epidemiology & Population Health, Stanford University School of Medicine, Stanford, CA 94305
4. Division of Epidemiology and Biostatistics, School of Public Health, University of California, Berkeley, CA 94720
5. Department of Civil and Environmental Engineering, University of California, Berkeley, CA 94720
6. Environmental Interventions Unit, Infectious Diseases Division, International Centre for Diarrhoeal Disease Research, Bangladesh, Dhaka, Bangladesh
7. Division of Infectious Diseases and Geographic Medicine, Stanford University School of Medicine, Stanford, CA 94305
8. Francis I. Proctor Foundation, University of California, San Francisco, CA 94143

\*Corresponding Author: Caitlin Niven, Jordan Hall Addition 2225, Raleigh, NC, 27606, +1 (415) 425 2910, [cgniven@ncsu.edu](mailto:cgniven@ncsu.edu)

Funding Sources: Bill & Melinda Gates Foundation, National Institutes of Health (NIH)

## Table of Contents

|                                                                                                                                                                                                              |               |
|--------------------------------------------------------------------------------------------------------------------------------------------------------------------------------------------------------------|---------------|
| <b>Table S1:</b> <i>E. coli</i> reporting units and detection limits by sample type _____                                                                                                                    | <b>Page 2</b> |
| <b>Table S2:</b> Number of samples collected by sample type and study round _____                                                                                                                            | <b>Page 2</b> |
| <b>Table S3:</b> Percentages of study observations within each weather category across different antecedent timeframes _____                                                                                 | <b>Page 3</b> |
| <b>Table S4:</b> Number of study observations and geometric mean <i>E. coli</i> counts by sample type for each weather category across different antecedent timeframes _____                                 | <b>Page 4</b> |
| <b>Table S5:</b> Adjusted <i>E. coli</i> count ratios by sample type associated with each weather category across different antecedent timeframes _____                                                      | <b>Page 5</b> |
| <b>Figure S1:</b> Daily precipitation and temperature, and monthly mean most probable number (MPN) of <i>E. coli</i> by sample type across the study period _____                                            | <b>Page 6</b> |
| <b>Figure S2:</b> Adjusted <i>E. coli</i> count ratios by sample type associated with above-median and elevated temperature, compared to below-median temperature, during different antecedent periods _____ | <b>Page 7</b> |
| <b>Figure S3:</b> Adjusted <i>E. coli</i> count ratios by sample type associated with heatwaves <sup>c</sup> within 7 and 14 days _____                                                                      | <b>Page 8</b> |

**Table S1. *E. coli* reporting units and detection limits by sample type**

|              | <b>Unit</b> | <b>Lower Limit (MPN)</b> | <b>Upper Limit (MPN)</b>                                     |
|--------------|-------------|--------------------------|--------------------------------------------------------------|
| Stored water | 100 mL      | 1                        | 2419.6                                                       |
| Food         | 1 dry gram  | 1–2 <sup>a</sup>         | 2,494 – 48,392 <sup>a</sup>                                  |
| Mother hands | 2 hands     | 5                        | 12,098                                                       |
| Child hands  | 2 hands     | 5                        | 12,098                                                       |
| Source water | 100 mL      | 1                        | 2,419.6                                                      |
| Soil         | 1 dry gram  | 1,000–1887 <sup>b</sup>  | 2.42 x 10 <sup>6</sup> – 4.56 x 10 <sup>6</sup> <sup>b</sup> |
| Ponds        | 100 mL      | 100                      | 241,960                                                      |
| Flies        | 1 fly       | 100                      | 241,960                                                      |

<sup>a</sup> Given a food moisture content range of 3-95%, a lower limit of 1 MPN and upper limit of 2,419.6 MPN per wet gram

<sup>b</sup> Given a soil moisture content range of 0-47%, a lower limit of 1,000 MPN and upper limit of 2,419,600 per wet gram

**Table S2. Number of samples collected by sample type and study round**

| <b>Round</b> | <b>Round 1</b> | <b>Round 2</b> | <b>Round 3</b> | <b>Round 4</b> | <b>Round 5</b> | <b>Round 6</b> | <b>Round 7</b> | <b>Round 8</b> | <b>Round 9</b> | <b>Total</b> |
|--------------|----------------|----------------|----------------|----------------|----------------|----------------|----------------|----------------|----------------|--------------|
| Stored water | 1623           | 641            | 592            | 571            | 599            | 581            | 582            | 574            | 587            | 6350         |
| Food         | 1646           | 0              | 0              | 329            | 206            | 0              | 0              | 0              | 0              | 2181         |
| Mother hands | 0              | 720            | 705            | 684            | 682            | 668            | 662            | 643            | 633            | 5397         |
| Child hands  | 1768           | 720            | 705            | 682            | 673            | 653            | 650            | 626            | 615            | 7092         |
| Source water | 1669           | 0              | 0              | 0              | 0              | 0              | 0              | 0              | 0              | 1669         |
| Soil         | 1795           | 0              | 0              | 402            | 341            | 0              | 0              | 0              | 0              | 2538         |
| Ponds        | 822            | 0              | 0              | 0              | 0              | 0              | 0              | 0              | 0              | 822          |
| Flies        | 610            | 0              | 0              | 0              | 0              | 0              | 0              | 0              | 0              | 610          |
| Total        | 9933           | 2081           | 2002           | 2668           | 2501           | 1902           | 1894           | 1843           | 1835           | 26659        |

**Table S3. Percentages of study observations within each weather category<sup>a</sup> across different antecedent timeframes. Study observation refers to unique combinations of household GPS coordinates and sample collection dates (total n=7253)**

|                   | <b>0 Days</b> | <b>1 Day</b> | <b>2 Days</b> | <b>7 Days</b> | <b>14 Days</b> |
|-------------------|---------------|--------------|---------------|---------------|----------------|
| No Rain           | 52.4% (3803)  | 45.1% (3274) | 41.6% (3014)  | 31.3% (2270)  | 18.8% (1361)   |
| Some Rain         | 38.2% (2773)  | 39.8% (2888) | 38.3% (2776)  | 34.8% (2525)  | 34% (2468)     |
| Heavy Rain        | 4.4% (319)    | 7.2% (521)   | 8.8% (641)    | 11.8% (858)   | 14.5% (1051)   |
| Extreme Rain      | 4.9% (358)    | 7.9% (570)   | 11.3% (822)   | 22.1% (1600)  | 32.7% (2373)   |
| Below Median Temp | 52.6% (3812)  | 48.0% (3483) | 46.1% (3344)  | 42.1% (3051)  | 38.4% (2785)   |
| Above Median Temp | 38.3% (2778)  | 40.0% (2903) | 39.9% (2896)  | 37.9% (2748)  | 34.3% (2486)   |
| Extreme Temp      | 9.1% (663)    | 12.0% (867)  | 14.0% (1013)  | 20.0% (1454)  | 27.3% (1982)   |
| No Heatwave       | --            | --           | --            | 90.2% (6543)  | 87.5% (6343)   |
| Heatwave          | --            | --           | --            | 9.8% (710)    | 12.5% (910)    |

<sup>a</sup> Weather classifications are as follows: No Rain (0 mm), Some Rain (<16.4 mm), Heavy Rain ( $\geq 16.4$  and < 28.2 mm), Extreme Rain ( $\geq 28.2$  mm), Below Median Temp (< 27.1°C), Above Median Temp ( $\geq 27.1$  and < 30.2°C), Extreme Temp ( $\geq 30.2$ °C), No Heatwave (<30.9°C), Heatwave ( $\geq 30.19$ °C for 3 consecutive days).



**Table S5. Adjusted<sup>a</sup> *E. coli* count ratios by sample type<sup>b</sup> associated with each weather category<sup>c</sup> across different antecedent timeframes**

| Adjusted          | Stored Water (N=6350)         |          | Food (N=2181)                 |          | Mother Hands (N = 5397)       |         | Child Hands (N= 7092)         |         | Source Water (N=1669)         |          | Soil (N=2538)                 |          | Ponds (N=822)                 |          | Flies (N=610)                 |          |
|-------------------|-------------------------------|----------|-------------------------------|----------|-------------------------------|---------|-------------------------------|---------|-------------------------------|----------|-------------------------------|----------|-------------------------------|----------|-------------------------------|----------|
|                   | <i>E. coli</i> Ratio (95% CI) | p-value  | <i>E. coli</i> Ratio (95% CI) | p-value  | <i>E. coli</i> Ratio (95% CI) | p-value | <i>E. coli</i> Ratio (95% CI) | p-value | <i>E. coli</i> Ratio (95% CI) | p-value  | <i>E. coli</i> Ratio (95% CI) | p-value  | <i>E. coli</i> Ratio (95% CI) | p-value  | <i>E. coli</i> Ratio (95% CI) | p-value  |
| <b>Day of</b>     |                               |          |                               |          |                               |         |                               |         |                               |          |                               |          |                               |          |                               |          |
| No Rain           | ref                           | --       | ref                           | --       | ref                           | --      | ref                           | --      | ref                           | --       | ref                           | --       | ref                           | --       | ref                           | --       |
| Some Rain         | 1.67 (1.29, 2.17)             | < 0.0005 | 1.45 (0.89, 2.35)             | 0.357    | 0.96 (0.72, 1.28)             | 0.771   | 1.38 (1.09, 1.74)             | 0.008   | 0.36 (0.12, 1.07)             | 0.066    | 0.87 (0.73, 1.05)             | 0.140    | 1.52 (1.03, 2.25)             | 0.036    | 0.95 (0.27, 3.39)             | 0.941    |
| Heavy Rain        | 1.674 (1.02, 2.64)            | 0.041    | 2.06 (1.22, 3.49)             | 0.007    | 1.62 (1.00, 2.60)             | 0.049   | 1.24 (0.68, 2.25)             | 0.478   | 1.93 (0.61, 6.13)             | 0.266    | 0.74 (0.52, 1.06)             | 0.101    | 4.46 (2.42, 8.20)             | < 0.0005 | 0.94 (0.30, 2.99)             | 0.923    |
| Extreme Rain      | 1.98 (1.36, 2.88)             | 0.041    | 3.13 (1.63, 5.99)             | 0.001    | 0.90 (0.57, 1.41)             | 0.632   | 0.92 (0.52, 1.60)             | 0.757   | 0.34 (0.07, 1.76)             | 0.198    | 0.36 (0.24, 0.53)             | < 0.0005 | 3.46 (2.34, 5.11)             | < 0.0005 | 0.03 (0.01, 0.19)             | < 0.0005 |
| Below Median Temp | ref                           | --       | ref                           | --       | ref                           | --      | ref                           | --      | ref                           | --       | ref                           | --       | ref                           | --       | ref                           | --       |
| Above Median Temp | 1.71 (1.39, 2.11)             | < 0.0005 | 5.31 (3.23, 8.73)             | < 0.0005 | 0.90 (0.70, 1.15)             | 0.38    | 1.22 (0.97, 1.54)             | 0.095   | °                             | °        | 0.79 (0.67, 0.93)             | 0.004    | °                             | °        | °                             | °        |
| Extreme Temp      | 1.49 (1.05, 2.12)             | 0.025    | 5.60 (3.14, 10.00)            | < 0.0005 | 1.02 (0.72, 1.43)             | 0.927   | 1.02 (0.65, 1.62)             | 0.919   | °                             | °        | 1.15 (0.82, 1.60)             | 0.412    | °                             | °        | °                             | °        |
| <b>1 Day</b>      |                               |          |                               |          |                               |         |                               |         |                               |          |                               |          |                               |          |                               |          |
| No Rain           | ref                           | --       | ref                           | --       | ref                           | --      | ref                           | --      | ref                           | --       | ref                           | --       | ref                           | --       | ref                           | --       |
| Some Rain         | 1.77 (1.37, 2.29)             | < 0.0005 | 1.19 (0.69, 2.07)             | 0.534    | 0.97 (0.73, 1.27)             | 0.798   | 1.03 (0.80, 1.34)             | 0.807   | 0.28 (0.12, 0.68)             | 0.005    | 0.95 (0.78, 1.17)             | 0.634    | 1.35 (0.93, 1.96)             | 0.111    | 0.91 (0.18, 4.75)             | 0.913    |
| Heavy Rain        | 1.23 (0.81, 1.87)             | 0.324    | 1.49 (0.80, 2.78)             | 0.475    | 1.44 (0.94, 2.20)             | 0.093   | 0.80 (0.50, 1.28)             | 0.345   | 0.58 (0.09, 3.51)             | 0.42     | 0.89 (0.68, 1.16)             | 0.367    | 2.91 (1.24, 6.82)             | 0.014    | 0.64 (0.15, 2.71)             | 0.549    |
| Extreme Rain      | 2.25 (1.57, 3.21)             | < 0.0005 | 2.13 (1.19, 3.86)             | 0.011    | 1.18 (0.84, 1.66)             | 0.348   | 0.97 (0.63, 1.49)             | 0.877   | 0.10 (0.02, 0.62)             | 0.014    | 0.35 (0.25, 0.48)             | < 0.0005 | 2.74 (1.51, 4.95)             | 0.001    | 0.28 (0.06, 1.39)             | 0.119    |
| Below Median Temp | ref                           | --       | ref                           | --       | ref                           | --      | ref                           | --      | ref                           | --       | ref                           | --       | ref                           | --       | ref                           | --       |
| Above Median Temp | 1.69 (1.35, 2.10)             | < 0.0005 | 11.71 (7.21, 19.02)           | < 0.0005 | 0.92 (0.70, 1.21)             | 0.554   | 1.25 (0.97, 1.61)             | 0.088   | °                             | °        | 0.89 (0.75, 1.04)             | 0.145    | °                             | °        | °                             | °        |
| Extreme Temp      | 1.62 (1.19, 2.22)             | 0.002    | 11.80 (6.48, 21.48)           | < 0.0005 | 0.91 (0.66, 1.25)             | 0.565   | 0.93 (0.63, 1.37)             | 0.723   | °                             | °        | 0.99 (0.73, 1.34)             | 0.959    | °                             | °        | °                             | °        |
| <b>2 Days</b>     |                               |          |                               |          |                               |         |                               |         |                               |          |                               |          |                               |          |                               |          |
| No Rain           | ref                           | --       | ref                           | --       | ref                           | --      | ref                           | --      | ref                           | --       | ref                           | --       | ref                           | --       | ref                           | --       |
| Some Rain         | 1.64 (1.27, 2.10)             | < 0.0005 | 1.06 (0.62, 1.83)             | 0.822    | 0.85 (0.65, 1.11)             | 0.233   | 1.00 (0.76, 1.32)             | 0.991   | 0.20 (0.08, 0.50)             | 0.001    | 0.93 (0.74, 1.16)             | 0.506    | 1.80 (1.32, 2.45)             | < 0.0005 | 5.34 (2.40, 11.89)            | < 0.0005 |
| Heavy Rain        | 1.21 (0.82, 1.81)             | 0.339    | 1.23 (0.68, 2.22)             | 0.49     | 1.24 (0.84, 1.83)             | 0.278   | 0.67 (0.43, 1.06)             | 0.087   | 0.21 (0.03, 1.62)             | 0.135    | 0.86 (0.66, 1.13)             | 0.280    | 3.36 (1.71, 6.57)             | < 0.0005 | 3.99 (1.64, 9.68)             | 0.002    |
| Extreme Rain      | 1.88 (1.34, 2.65)             | < 0.0005 | 1.40 (0.81, 2.42)             | 0.226    | 0.94 (0.67, 1.32)             | 0.717   | 0.88 (0.62, 1.27)             | 0.503   | 0.34 (0.01, 1.13)             | 0.079    | 0.46 (0.34, 0.61)             | < 0.0005 | 2.36 (1.22, 4.57)             | 0.011    | 4.10 (1.16, 14.48)            | 0.028    |
| Below Median Temp | ref                           | --       | ref                           | --       | ref                           | --      | ref                           | --      | ref                           | --       | ref                           | --       | ref                           | --       | ref                           | --       |
| Above Median Temp | 1.58 (1.24, 2.01)             | < 0.0005 | 11.35 (6.79, 18.97)           | < 0.0005 | 0.99 (0.76, 1.30)             | 0.964   | 1.33 (1.01, 1.75)             | 0.042   | °                             | °        | 0.88 (0.74, 1.06)             | 0.183    | °                             | °        | °                             | °        |
| Extreme Temp      | 1.63 (1.20, 2.23)             | 0.002    | 13.75 (7.56, 25.00)           | < 0.0005 | 0.91 (0.67, 1.24)             | 0.555   | 0.98 (0.68, 1.41)             | 0.900   | °                             | °        | 0.94 (0.72, 1.24)             | 0.662    | °                             | °        | °                             | °        |
| <b>7 Days</b>     |                               |          |                               |          |                               |         |                               |         |                               |          |                               |          |                               |          |                               |          |
| No Rain           | ref                           | --       | ref                           | --       | ref                           | --      | ref                           | --      | ref                           | --       | ref                           | --       | ref                           | --       | ref                           | --       |
| Some Rain         | 1.42 (1.06, 1.91)             | 0.019    | 0.59 (0.34, 1.02)             | 0.059    | 0.72 (0.53, 0.98)             | 0.039   | 0.88 (0.61, 1.28)             | 0.503   | 0.17 (0.07, 0.45)             | < 0.0005 | 1.11 (0.83, 1.49)             | 0.494    | 1.14 (0.79, 66)               | 0.478    | 1.30 (0.51, 3.32)             | 0.582    |
| Heavy Rain        | 1.47 (0.96, 2.23)             | 0.072    | 0.74 (0.36, 1.54)             | 0.426    | 0.96 (0.64, 1.44)             | 0.83    | 0.82 (0.53, 1.27)             | 0.372   | 0.07 (0.01, 0.47)             | 0.006    | 0.84 (0.61, 1.16)             | 0.283    | 2.34 (1.22, 4.49)             | 0.011    | 0.83 (0.26, 2.60)             | 0.744    |
| Extreme Rain      | 1.77 (1.22, 2.57)             | 0.002    | 0.81 (0.49, 1.34)             | 0.418    | 0.67 (0.48, 0.94)             | 0.02    | 1.13 (0.76, 1.68)             | 0.548   | 0.13 (0.02, 0.63)             | 0.012    | 0.66 (0.49, 0.89)             | 0.007    | 1.52 (0.88, 2.63)             | 0.135    | 2.62 (0.98, 7.04)             | 0.056    |
| Below Median Temp | ref                           | --       | ref                           | --       | ref                           | --      | ref                           | --      | ref                           | --       | ref                           | --       | ref                           | --       | ref                           | --       |
| Above Median Temp | 1.61 (1.25, 2.07)             | < 0.0005 | 13.09 (8.96, 19.12)           | < 0.0005 | 1.10 (0.84, 1.46)             | 0.482   | 1.27 (0.92, 1.74)             | 0.150   | °                             | °        | 0.93 (0.77, 1.14)             | 0.497    | °                             | °        | °                             | °        |
| Extreme Temp      | 1.74 (1.33, 2.28)             | < 0.0005 | 21.39 (14.46, 31.65)          | < 0.0005 | 1.00 (0.76, 1.32)             | 0.979   | 0.90 (0.63, 1.27)             | 0.533   | °                             | °        | 0.74 (0.56, 0.97)             | 0.029    | °                             | °        | °                             | °        |
| No Heatwave       | ref                           | --       | ref                           | --       | ref                           | --      | ref                           | --      | ref                           | --       | ref                           | --       | ref                           | --       | ref                           | --       |
| Heatwave          | 1.15 (0.85, 1.55)             | 0.378    | 0.81 (0.47, 1.40)             | 0.452    | 0.81 (0.59, 1.11)             | 0.189   | 0.79 (0.50, 1.27)             | 0.334   | °                             | °        | 0.54 (0.38, 0.78)             | 0.001    | °                             | °        | °                             | °        |
| <b>14 Days</b>    |                               |          |                               |          |                               |         |                               |         |                               |          |                               |          |                               |          |                               |          |
| No Rain           | ref                           | --       | ref                           | --       | ref                           | --      | ref                           | --      | ref                           | --       | ref                           | --       | ref                           | --       | ref                           | --       |
| Some Rain         | 0.85 (0.60, 1.21)             | 0.371    | 0.80 (0.53, 1.21)             | 0.295    | 0.78 (0.54, 1.15)             | 0.210   | 1.05 (0.71, 1.54)             | 0.809   | 0.26 (0.09, 0.75)             | 0.013    | 1.16 (0.92, 1.45)             | 0.204    | 1.15 (0.86, 1.53)             | 0.336    | 0.70 (0.36, 1.35)             | 0.287    |
| Heavy Rain        | 0.81 (0.55, 1.21)             | 0.312    | 0.64 (0.36, 1.14)             | 0.132    | 0.87 (0.51, 1.46)             | 0.591   | 1.18 (0.73, 1.90)             | 0.504   | 0.11 (0.02, 0.50)             | 0.004    | 0.82 (0.61, 1.10)             | 0.182    | 1.99 (1.29, 3.07)             | 0.002    | 0.66 (0.28, 1.58)             | 0.352    |
| Extreme Rain      | 1.04 (0.67, 1.60)             | 0.869    | 0.65 (0.36, 1.15)             | 0.141    | 0.81 (0.49, 1.35)             | 0.422   | 1.27 (0.82, 1.97)             | 0.292   | 0.23 (0.05, 1.07)             | 0.062    | 0.78 (0.57, 1.05)             | 0.102    | 1.60 (0.99, 2.60)             | 0.057    | 1.91 (0.74, 4.90)             | 0.179    |
| Below Median Temp | ref                           | --       | ref                           | --       | ref                           | --      | ref                           | --      | ref                           | --       | ref                           | --       | ref                           | --       | ref                           | --       |
| Above Median Temp | 1.46 (1.12, 1.91)             | 0.005    | 11.37 (7.61, 16.98)           | < 0.0005 | 1.23 (0.90, 1.69)             | 0.189   | 1.07 (0.76, 1.50)             | 0.691   | °                             | °        | 0.94 (0.74, 1.18)             | 0.584    | °                             | °        | °                             | °        |
| Extreme Temp      | 1.52 (1.17, 1.96)             | 0.001    | 20.74 (14.53, 29.61)          | < 0.0005 | 1.01 (0.73, 1.39)             | 0.944   | 0.78 (0.55, 1.11)             | 0.162   | °                             | °        | 0.80 (0.63, 1.03)             | 0.088    | °                             | °        | °                             | °        |
| No Heatwave       | ref                           | --       | ref                           | --       | ref                           | --      | ref                           | --      | ref                           | --       | ref                           | --       | ref                           | --       | ref                           | --       |
| Heatwave          | 1.14 (0.86, 1.51)             | 0.359    | 1.58 (0.94, 2.66)             | 0.086    | 0.79 (0.57, 1.09)             | 0.149   | 0.74 (0.51, 1.08)             | 0.116   | °                             | °        | 0.50 (0.36, 0.70)             | < 0.0005 | °                             | °        | °                             | °        |

<sup>a</sup> Models for rainfall adjusted for temperature and vice versa. All adjusted models also controlled for the following variables: Binary intervention variable (intervention or control), sex of index child, age of index child (in days), number of children under the age of 18 in the household, number of people in the compound, mother's age (in years), mother's educational status, food security category (using HFIAS scale), minutes to water source, household having improved walls, household having improved floors, household wealth quintile based on owned assets, number of cows, goats and chickens/ducks in the compound, source water origin from a tubewell. Food models included hours since stored food was prepared and stored drinking water models included covered storage container, narrow-mouth storage container, and hours water has been stored.

<sup>b</sup> We could not estimate effects of extreme temperature and heat waves on source water (tubewells), ponds and flies due to data sparsity.

<sup>c</sup> Weather classifications are as follows: No Rain (0 mm), Some Rain (<16.4 mm), Heavy Rain (≥16.4 and < 28.2 mm), Extreme Rain (≥ 28.2 mm), Below Median Temp (< 27.1°C), Above Median Temp (≥27.1 and < 30.2°C), Extreme Temp (≥ 30.2°C), No Heatwave (<30.9°C), Heatwave (≥ 30.19°C for 3 consecutive days).

**Figure S1: Daily precipitation and temperature, and monthly mean most probable number (MPN) of *E. coli* by sample type across the study period**

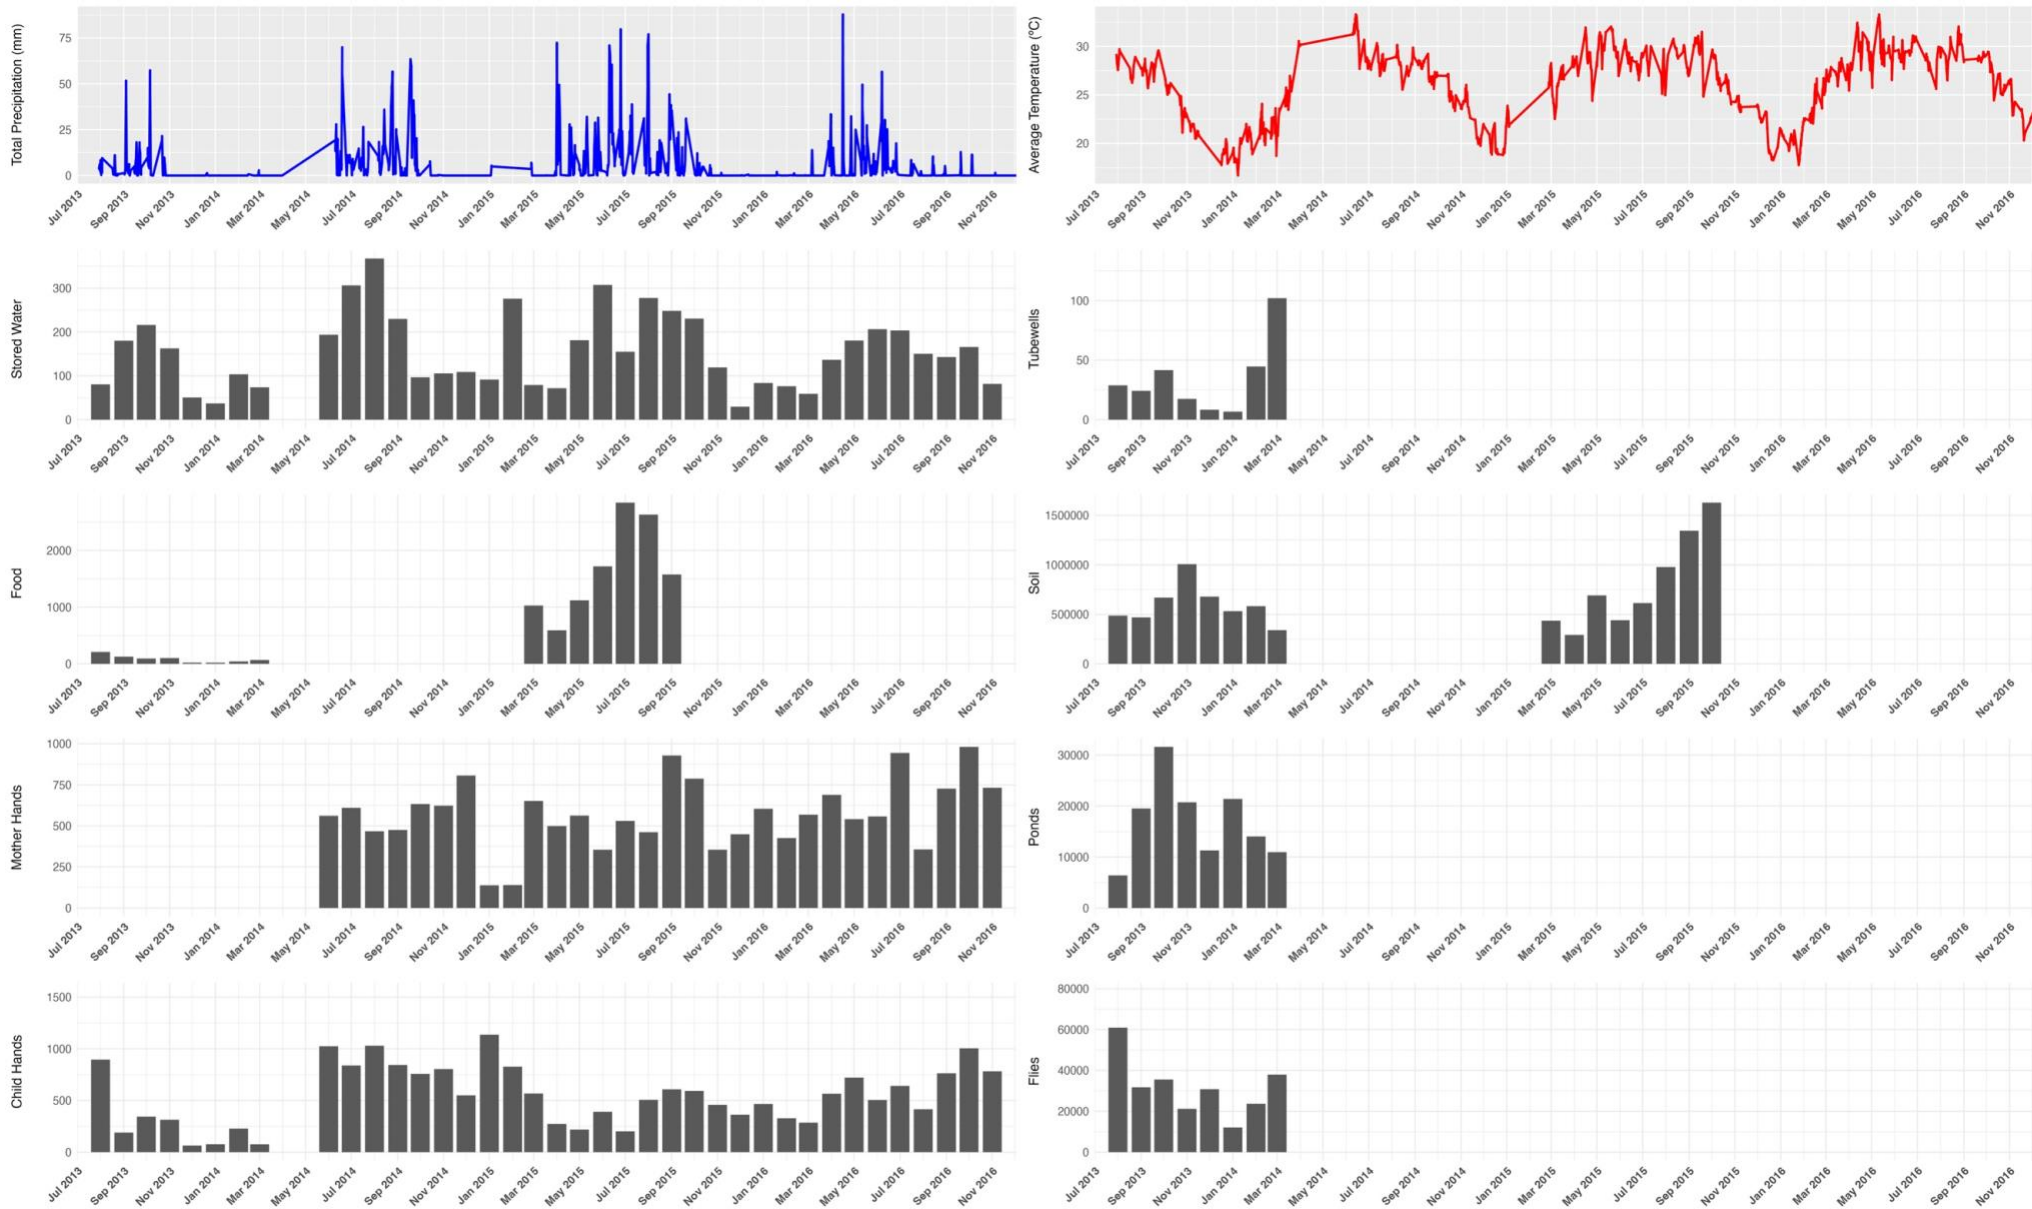

**Figure S2: Adjusted<sup>a</sup> *E. coli* count ratios by sample type associated with above-median and elevated temperature<sup>b</sup>, compared to below-median temperature, during different antecedent periods**

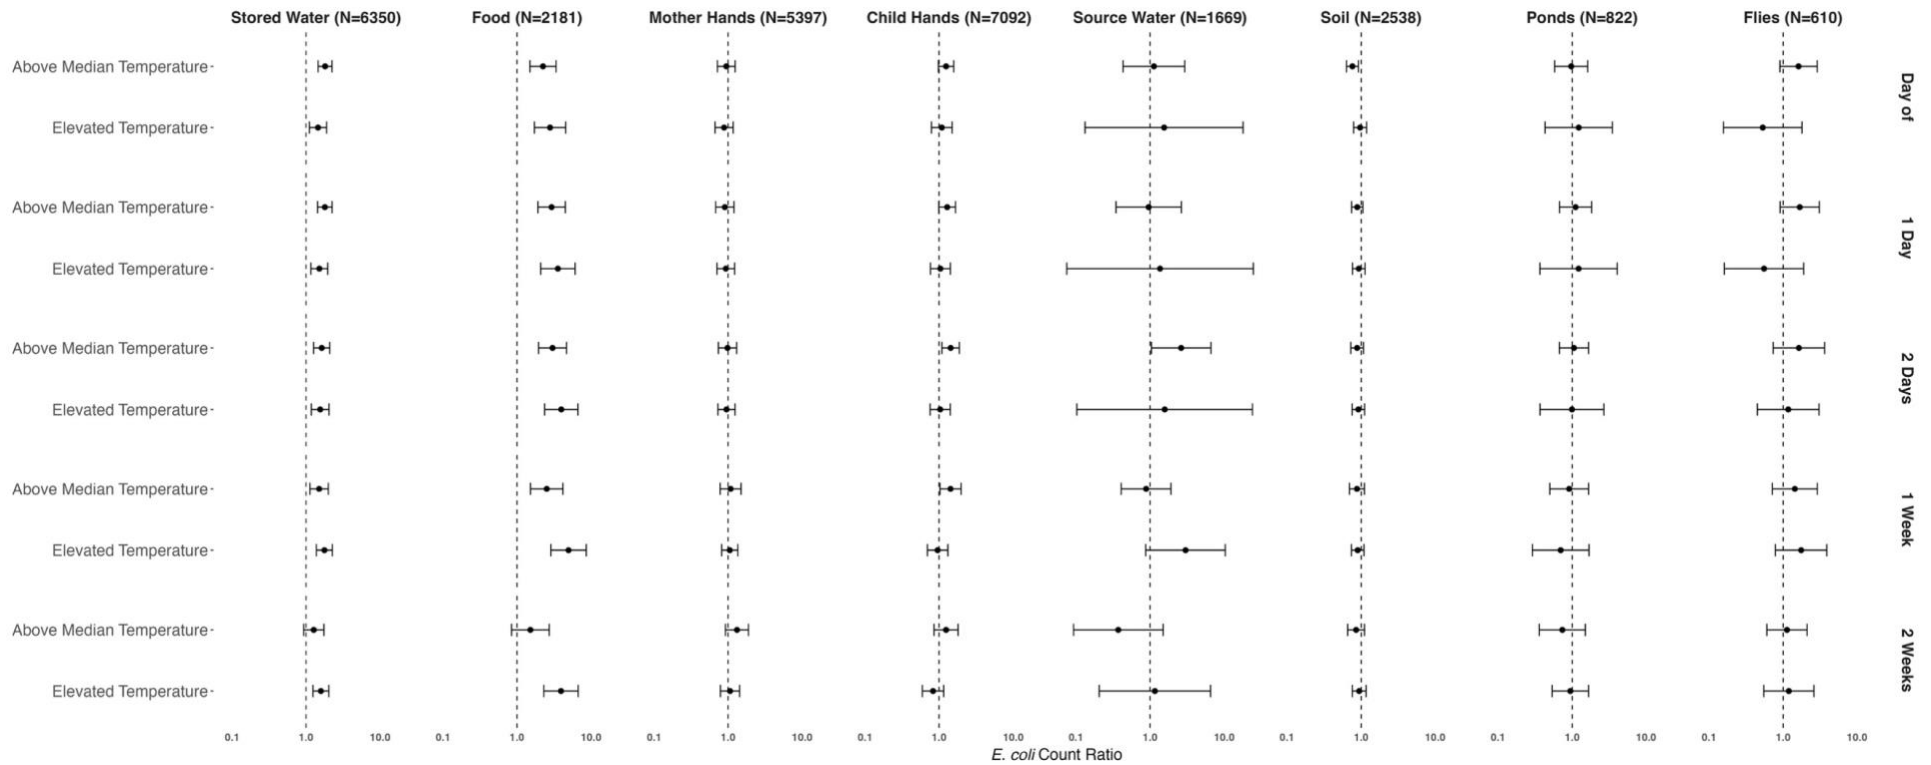

<sup>a</sup> All adjusted temperature models controlled for the following variables: Rolling mean rainfall for the same antecedent period, binary intervention variable (intervention or control), sex of index child, age of index child (in days), number of children under the age of 18 in the household, number of people in the compound, mother's age (in years), mother's educational status, food security category (using HFIAS scale), minutes to water source, household having improved walls, household having improved floors, household wealth quintile based on owned assets, number of cows, goats and chickens/ducks in the compound, source water origin from a tubewell. Food models included hours since stored food was prepared and stored drinking water models included covered storage container, narrow-mouth storage container, and hours water has been stored.

<sup>b</sup> Below Median Temperature ( $< 27.1^{\circ}\text{C}$ ), Above Median Temperature ( $\geq 27.1$  and  $< 30.2^{\circ}\text{C}$ ), Elevated Temperature ( $\geq 29.3^{\circ}\text{C}$ ).

Figure S3. Adjusted<sup>a</sup> *E. coli* count ratios by sample type<sup>b</sup> associated with heatwaves<sup>c</sup> within 7 and 14 days

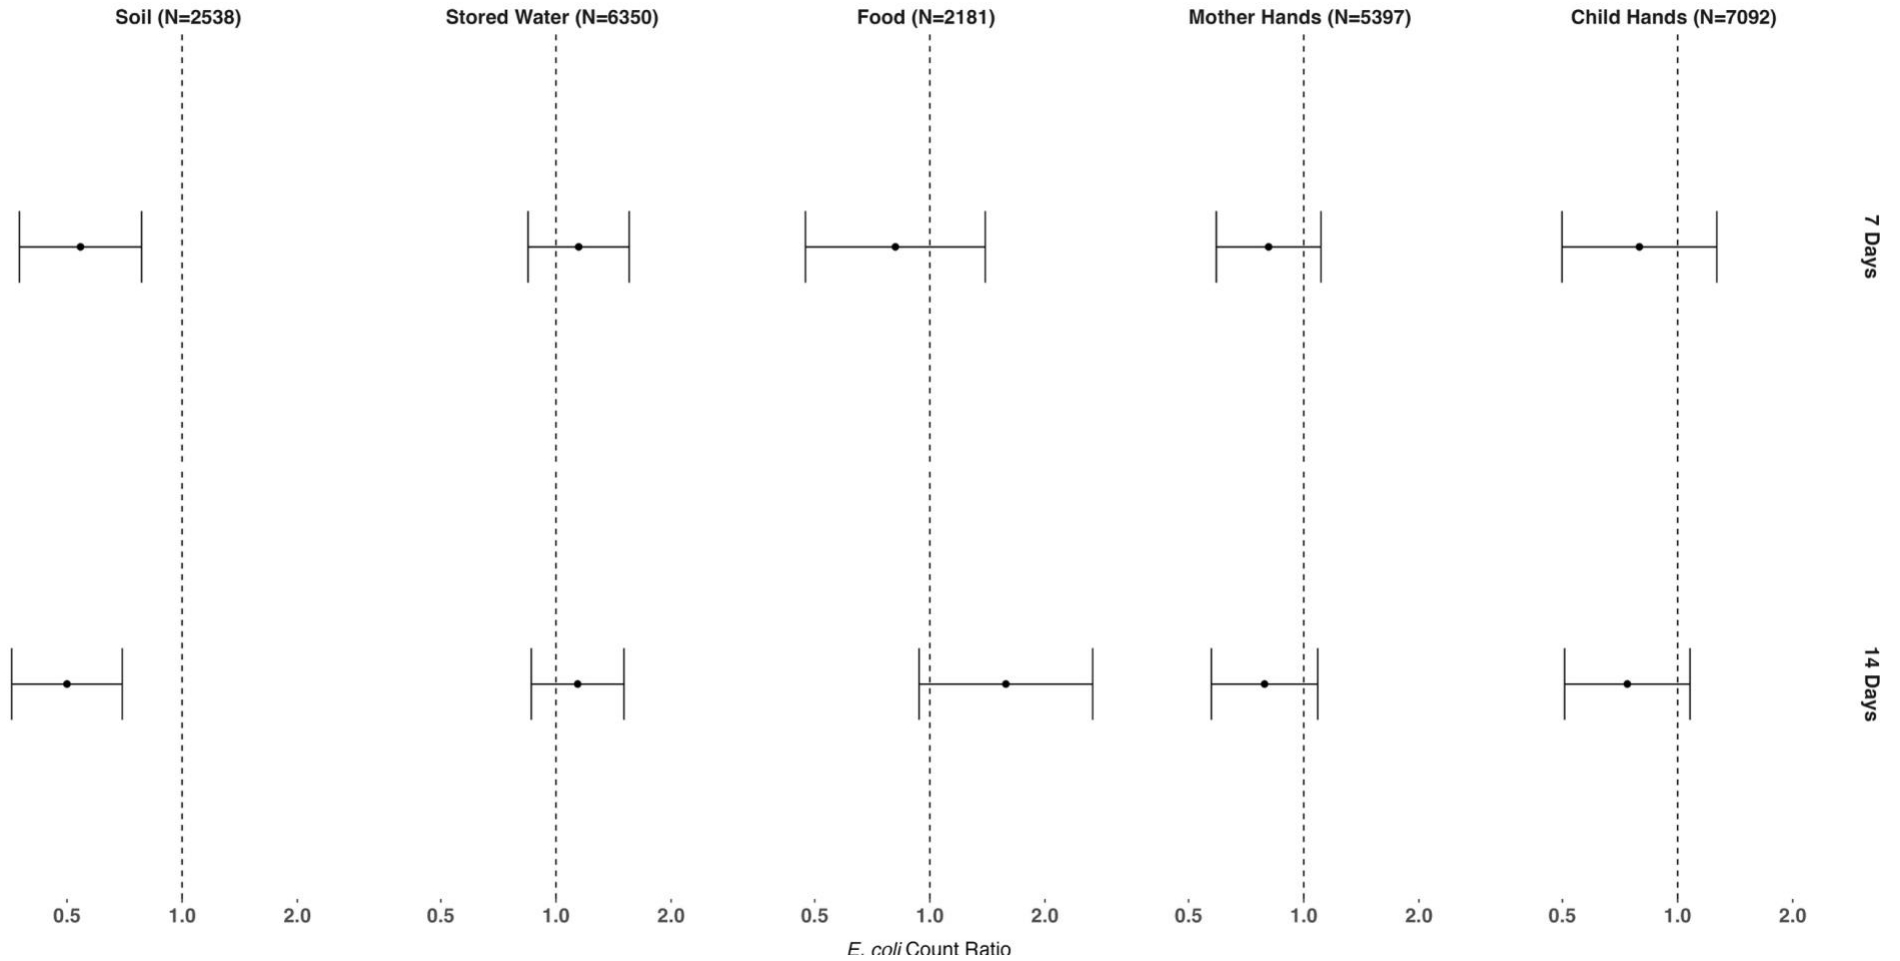

<sup>a</sup> All adjusted temperature models controlled for the following variables: Rolling mean rainfall for the same antecedent period, binary intervention variable (intervention or control), sex of index child, age of index child (in days), number of children under the age of 18 in the household, number of people in the compound, mother’s age (in years), mother’s educational status, food security category (using HFIAS scale), minutes to water source, household having improved walls, household having improved floors, household wealth quintile based on owned assets, number of cows, goats and chickens/ducks in the compound, source water origin from a tubewell. Food models included hours since stored food was prepared and stored drinking water models included covered storage container, narrow-mouth storage container, and hours water has been stored.

<sup>b</sup> We could not estimate effects of heatwaves on source water (tubewells), ponds and flies due to data sparsity.

<sup>c</sup> Heatwave defined as daily maximum temperature values >95th percentile (30.9°C) for three consecutive days.
